# Supplementary figures and images for: Therapeutic efficacy of traditional Chinese medicine, Shen-Mai San, in cancer patients undergoing chemotherapy or radiotherapy: study protocol for a randomized, double-blind, placebo-controlled trial
Source: Springer Nature journal article supplement (doi:10.1186/1745-6215-13-232), 2012-12-01

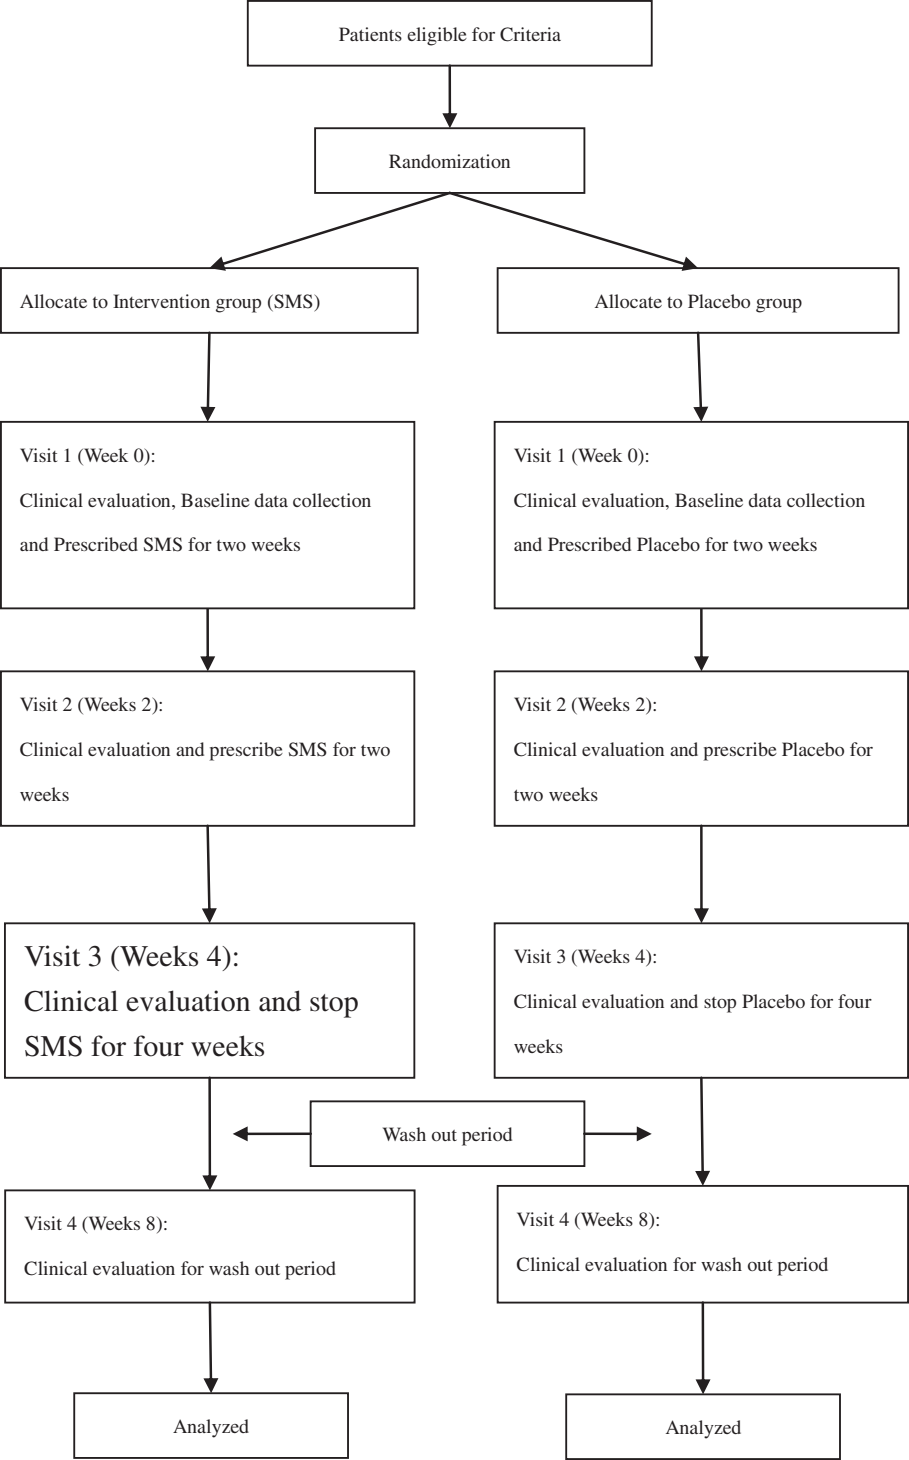

Supplement: 13063_2012_1144_MOESM1_ESM.pdf [file 13063_2012_1144_MOESM1_ESM.pdf]
